# Supplementary material for: Genome-wide prediction of cis-regulatory regions using supervised deep learning methods
Source: PubMed Central journal article supplement (PMC5984344; doi:10.1186/s12859-018-2187-1), 2018-05-31
Supplement: 12859_2018_2187_MOESM1_ESM.pdf [file 12859_2018_2187_MOESM1_ESM.pdf]

# Supplementary Tables and Figures for “Genome-Wide Prediction of cis-Regulatory Regions Using Supervised Deep Learning Methods”

Yifeng Li<sup>\*1,2</sup>, Wenqiang Shi<sup>†1</sup>, and Wyeth W. Wasserman<sup>‡1</sup>

<sup>1</sup>Centre for Molecular Medicine and Therapeutics, BC Children’s Hospital Research Institute, Department of Medical Genetics, University of British Columbia

<sup>2</sup>Digital Technologies Research Centre, National Research Council Canada

Table S1: Numbers of labelled regions in our data.

| Cell    | A-E   | I-E    | A-P    | I-P     | A-X    | I-X    | UK     | Total   |
|---------|-------|--------|--------|---------|--------|--------|--------|---------|
| A549    | 387   | 40,387 | 10,907 | 128,998 | 8,998  | 14,712 | 81,217 | 285,606 |
| GM12878 | 2,878 | 28,156 | 10,816 | 73,891  | 8,226  | 19,078 | 80,004 | 223,049 |
| HelaS3  | 1847  | 32,179 | 10,759 | 79,009  | 9,123  | 22,071 | 81,502 | 236,485 |
| HepG2   | 1465  | 34,556 | 11,467 | 96,184  | 9,931  | 19,071 | 79,417 | 252,091 |
| HUVEC   | 1226  | 35,143 | 11,254 | 101,861 | 9,739  | 18,249 | 80,333 | 257,805 |
| K562    | 894   | 34,392 | 10,076 | 82,829  | 9,033  | 20,261 | 78,081 | 235,566 |
| MCF7    | 249   | 36,873 | 10,733 | 81,510  | 10,829 | 13,653 | 82,663 | 236,510 |

Table S2: Number of features used for each cell type and number of common features between any two cell types in our labelled data.

| Cell    | A549 | GM12878 | HelaS3 | HepG2 | HMEC | HUVEC | K562 | MCF7 |
|---------|------|---------|--------|-------|------|-------|------|------|
| A549    | 45   | 38      | 26     | 38    | 15   | 19    | 38   | 25   |
| GM12878 | -    | 101     | 50     | 54    | 16   | 21    | 69   | 26   |
| HelaS3  | -    | -       | 74     | 43    | 16   | 22    | 56   | 23   |
| HepG2   | -    | -       | -      | 72    | 16   | 21    | 57   | 28   |
| HMEC    | -    | -       | -      | -     | 16   | 16    | 16   | 9    |
| HUVEC   | -    | -       | -      | -     | -    | 24    | 24   | 13   |
| K562    | -    | -       | -      | -     | -    | -     | 135  | 29   |
| MCF7    | -    | -       | -      | -     | -    | -     | -    | 38   |

\*E-mail address: [yifeng@cmmt.ubc.ca](mailto:yifeng@cmmt.ubc.ca), and [yifeng.li@nrc-cnrc.gc.ca](mailto:yifeng.li@nrc-cnrc.gc.ca).

†E-mail address: [shi@cmmt.ubc.ca](mailto:shi@cmmt.ubc.ca).

‡Corresponding author, E-mail address: [wyeth@cmmt.ubc.ca](mailto:wyeth@cmmt.ubc.ca).

Table S3: Confusion matrices of classifying CRE-seq and MPRA validated regions using DECRES.

| Original Class\DECRES Class                          | A-E | A-P | BG  | Total |
|------------------------------------------------------|-----|-----|-----|-------|
| CRE-seq Positive Combined Predicted Enhancer in K562 | 254 | 0   | 132 | 386   |
| CRE-seq Negative Combined Predicted Enhancer in K562 | 433 | 1   | 378 | 812   |
| Combined Predicted Repressed Region in K562          | 0   | 0   | 298 | 298   |
| Total                                                | 687 | 1   | 808 | 1496  |
| MPRA Positive Enhancer in K562                       | 120 | 0   | 2   | 122   |
| MPRA Negative Enhancer in K562                       | 179 | 0   | 15  | 194   |
| Total                                                | 299 | 0   | 17  | 316   |
| MPRA Positive Enhancer in HepG2                      | 182 | 1   | 3   | 186   |
| MPRA Negative Enhancer in HepG2                      | 217 | 5   | 45  | 267   |
| Total                                                | 399 | 6   | 48  | 453   |

Table S4: Numbers of predicted and cell-specific *cis*-regulatory regions in the whole human genome. Columns 2-3: results of two-class prediction. Columns 4-7: results of three class prediction.

| Cell    | A-E+A-P | Specific | A-E     | Specific | A-P    | Specific |
|---------|---------|----------|---------|----------|--------|----------|
| GM12878 | 90,192  | 27,904   | 70,905  | 27,185   | 19,287 | 6,090    |
| HelaS3  | 100,102 | 22,268   | 92,509  | 22,866   | 7,593  | 979      |
| HepG2   | 114,873 | 35,986   | 105,007 | 41,109   | 9,866  | 2,135    |
| HMEC    | 104,621 | 28,774   | 88,803  | 26,262   | 15,818 | 3,043    |
| HUVEC   | 110,347 | 16,415   | 97,069  | 35,073   | 13,278 | 582      |
| K562    | 133,940 | 30,835   | 122,321 | 56,374   | 11,619 | 371      |

Table S5: Numbers of predicted A-Es and A-Ps on the 102,021 BDT loci. AiA: Active in the FANTOM Enhancer Atlas. IiA: Inactive in the FANTOM Enhancer Atlas. NiA: Not included in the FANTOM Enhancer Atlas. Specific: Predicted cell-specific A-Es.

| Cell    | A-E    | A-P   | BG     |
|---------|--------|-------|--------|
| GM12878 | 11,910 | 1,975 | 88,136 |
| HelaS3  | 12,743 | 226   | 89,052 |
| HepG2   | 10,761 | 488   | 90,772 |
| HMEC    | 13,356 | 1,267 | 87,398 |
| HUVEC   | 17,192 | 758   | 84,071 |
| K562    | 13,936 | 288   | 87,797 |

Table S6: Overlap between our predicted A-Es and the FANTOM enhancer atlas.

| Cell\Element | AiA   | IiA   | NiA   | Specific |
|--------------|-------|-------|-------|----------|
| GM12878      | 2,088 | 5,144 | 4,678 | 4,199    |
| HelaS3       | 1,459 | 6,435 | 4,849 | 1,073    |
| HepG2        | 1,178 | 4,888 | 4,695 | 1,495    |
| HMEC         | 1,250 | 6,644 | 5,462 | 1,916    |
| HUVEC        | 879   | 8,716 | 7,597 | 3,560    |
| K562         | 750   | 7,383 | 5,803 | 2,965    |

Table S7: Transcription factors whose binding motifs are enriched in specific cells.

| Cell    | Transcription Factor                          | Functionality                                                                                                                                                                                                                                                       |
|---------|-----------------------------------------------|---------------------------------------------------------------------------------------------------------------------------------------------------------------------------------------------------------------------------------------------------------------------|
| GM12878 | RUNX1                                         | RUNX1 and other Runt-related factors play crucial roles in haematopoiesis. Translocation of RUNX1 leads to severe acute myeloid leukemia [11].                                                                                                                      |
| GM12878 | REL/NF- $\kappa$ B Factors                    | Play a critical role in immune response to infection [4].                                                                                                                                                                                                           |
| HelaS3  | C/EBP-Related Factors                         | C/EBP-related factors, a subfamily of the basic leucine zipper factors (bZIP), regulating genes involved in immune and inflammatory responses, are expressed in cervix [1].                                                                                         |
| HelaS3  | CREB-Related Factors (Another bZIP Subfamily) | Possibly up-regulate Bcl-2 expression in apoptotic HeLa cells induced by trichosanthin [15].                                                                                                                                                                        |
| HelaS3  | TEAD1                                         | Plays a role of apoptotic resistance in Hela cells [9].                                                                                                                                                                                                             |
| HelaS3  | AP-2 Factors                                  | Can act as tumor suppressor, and malfunction of AP-2 was found in cervical cancer cells [2].                                                                                                                                                                        |
| HelaS3  | HOX Factors                                   | a subgroup of HOX genes involve in cervical carcinoma [8].                                                                                                                                                                                                          |
| HepG2   | HNF1A, HNF1B, FOXA1, FOXA2, HNF4A, and HNF4G  | These factors are hepatocyte nuclear factors that regulate liver-specific genes [3, 16].                                                                                                                                                                            |
| HepG2   | C/EBPs                                        | Have a pivotal role in liver development and function [13].                                                                                                                                                                                                         |
| HMEC    | TEAD Family                                   | Members of this family regulate epithelial-mesenchymal transition [17].                                                                                                                                                                                             |
| HUVEC   | GATA Factors                                  | Involve in networks of key determinants of vascular endothelial cell identity [7].                                                                                                                                                                                  |
| HUVEC   | SOX Factors                                   | Regulate vascular cell development and growth (vasculogenesis) [12].                                                                                                                                                                                                |
| HUVEC   | CREB-Related Factors                          | Involve in several specific pathways in HUVEC cell [14].                                                                                                                                                                                                            |
| K562    | GATA-Type, NFYA, and NFYB USF1                | The NFY factors cooperate with GATA1 to mediate erythroid-specific transcription, and coassociate with FOS binding to both promoters and enhancers in K562 [5]. The NFY factors are also found cooperate with USF1 and USF2 to active HOXB4 for hematopoiesis [18]. |
| K562    | STAT5                                         | Maintains the high-level cell proliferation of K562 [10].                                                                                                                                                                                                           |

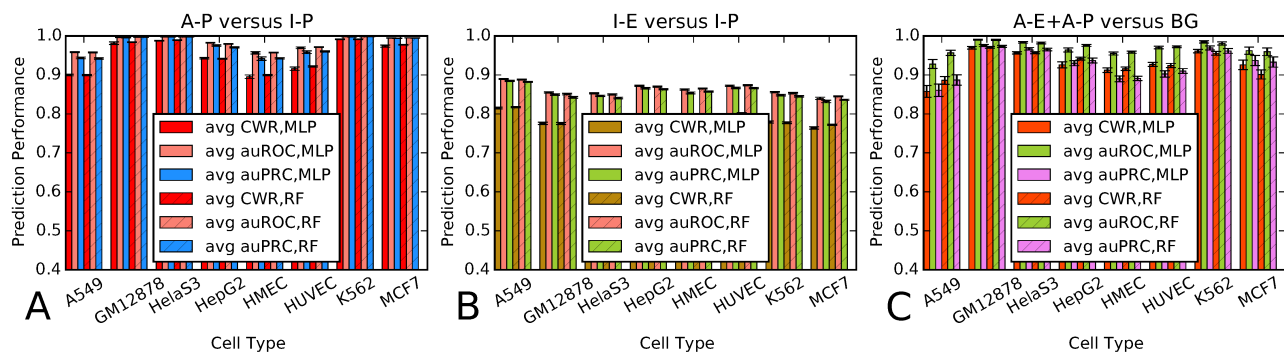

Figure S1: Mean performance and standard deviation of 10-fold cross-validations using the MLP model on our labelled data of eight cell types. A-E: Active Enhancer, A-P: Active Promoter, A-X: Active Exon, I-E: Inactive Enhancer, I-P: Inactive Promoter, I-X: Inactive Exon, UK: Unknown or Uncharacterized, BG: I-E+I-P+A-X+I-X+UK.

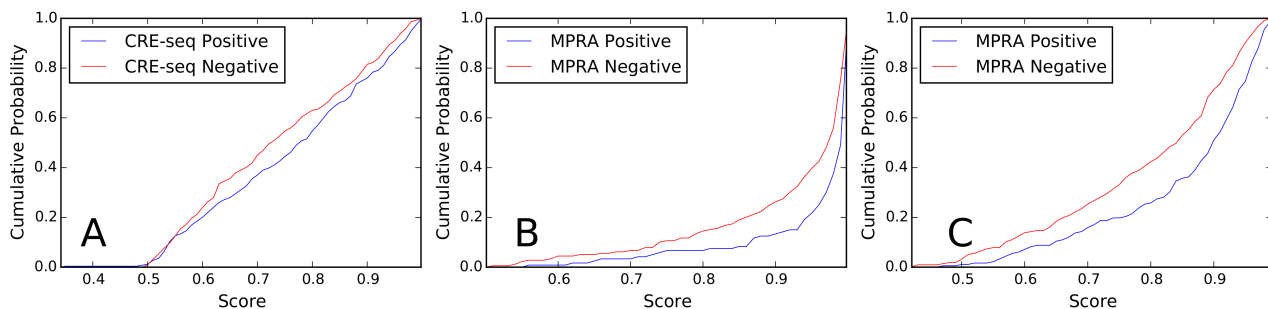

Figure S2: Cumulative DECREASE membership probabilities (scores) of enhancers that were tested as positives and negatives by CRE-seq or MPRA. These enhancers were predicted as A-Es by DECREASE (See Table S3).

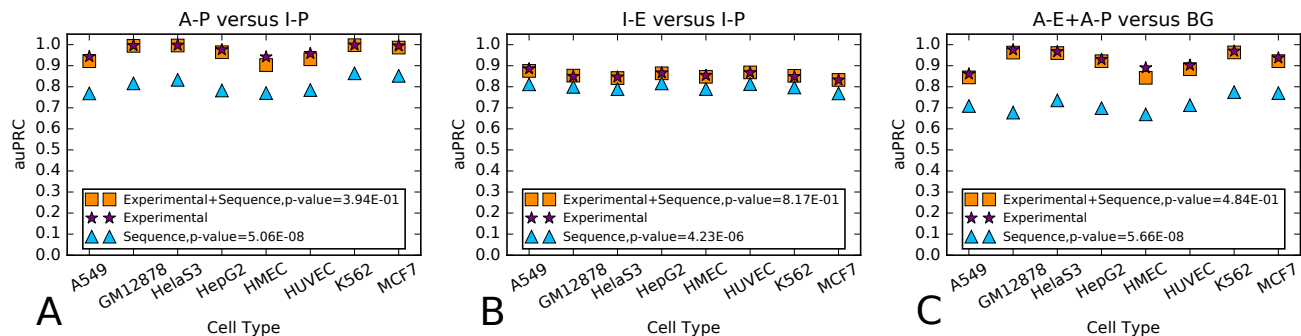

Figure S3: Comparing the mean auPRCs over 100 resampling and retraining on our labelled regions using different feature sets. “Experimental” means our experimentally derived next generation sequencing feature set. “Sequence” means the set of 351 sequence properties used in [6]. “Experimental+Sequence” means the combination of these two sets. The  $p$ -values in each legend were obtained using two-tailed Student’s  $t$ -test to compare “Experimental”-based results with “Experimental+Sequence”-based and “Sequence”-based results, respectively.

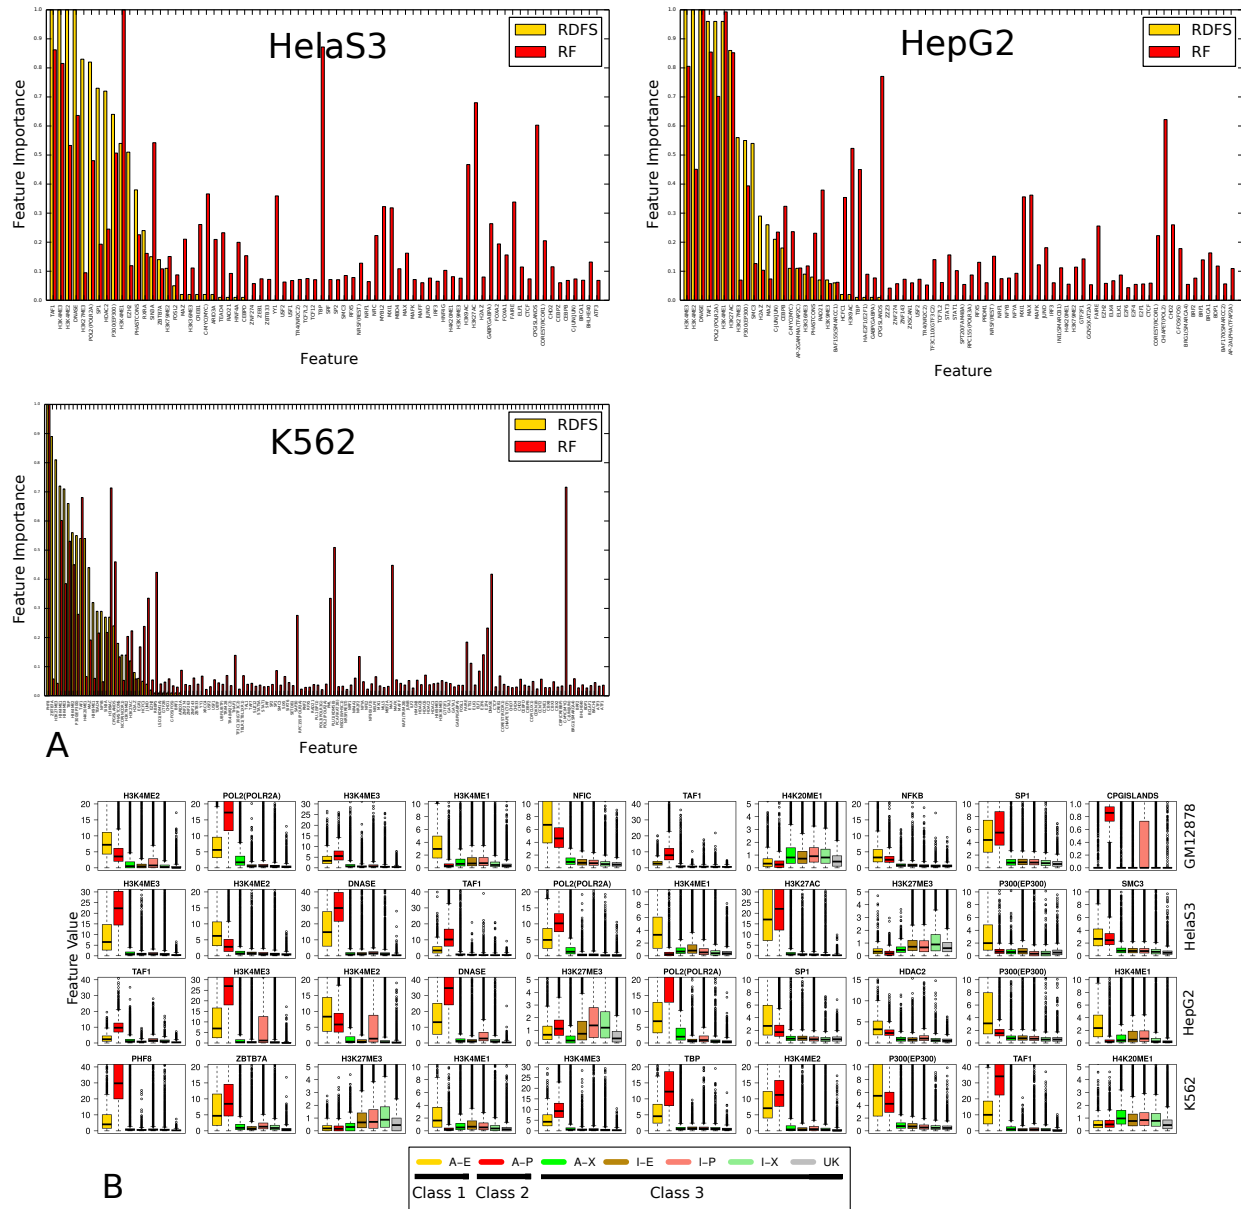

Figure S4: Feature importance and box plots of top features in the 3-class (A-E versus A-P versus BG) scenario. A: Feature importance discovered by randomized DFS (RDFS) and random forest (RF) on HeLaS3, HepG2 and K562 cells. RF's feature importance scores were normalized to [0,1] for better comparison with RDFS. B: For the top 10 features of the 3-class models generated for four well-characterized cell lines, box plots depict the range of observed feature values (log2 scale) for 7 sequence classes.

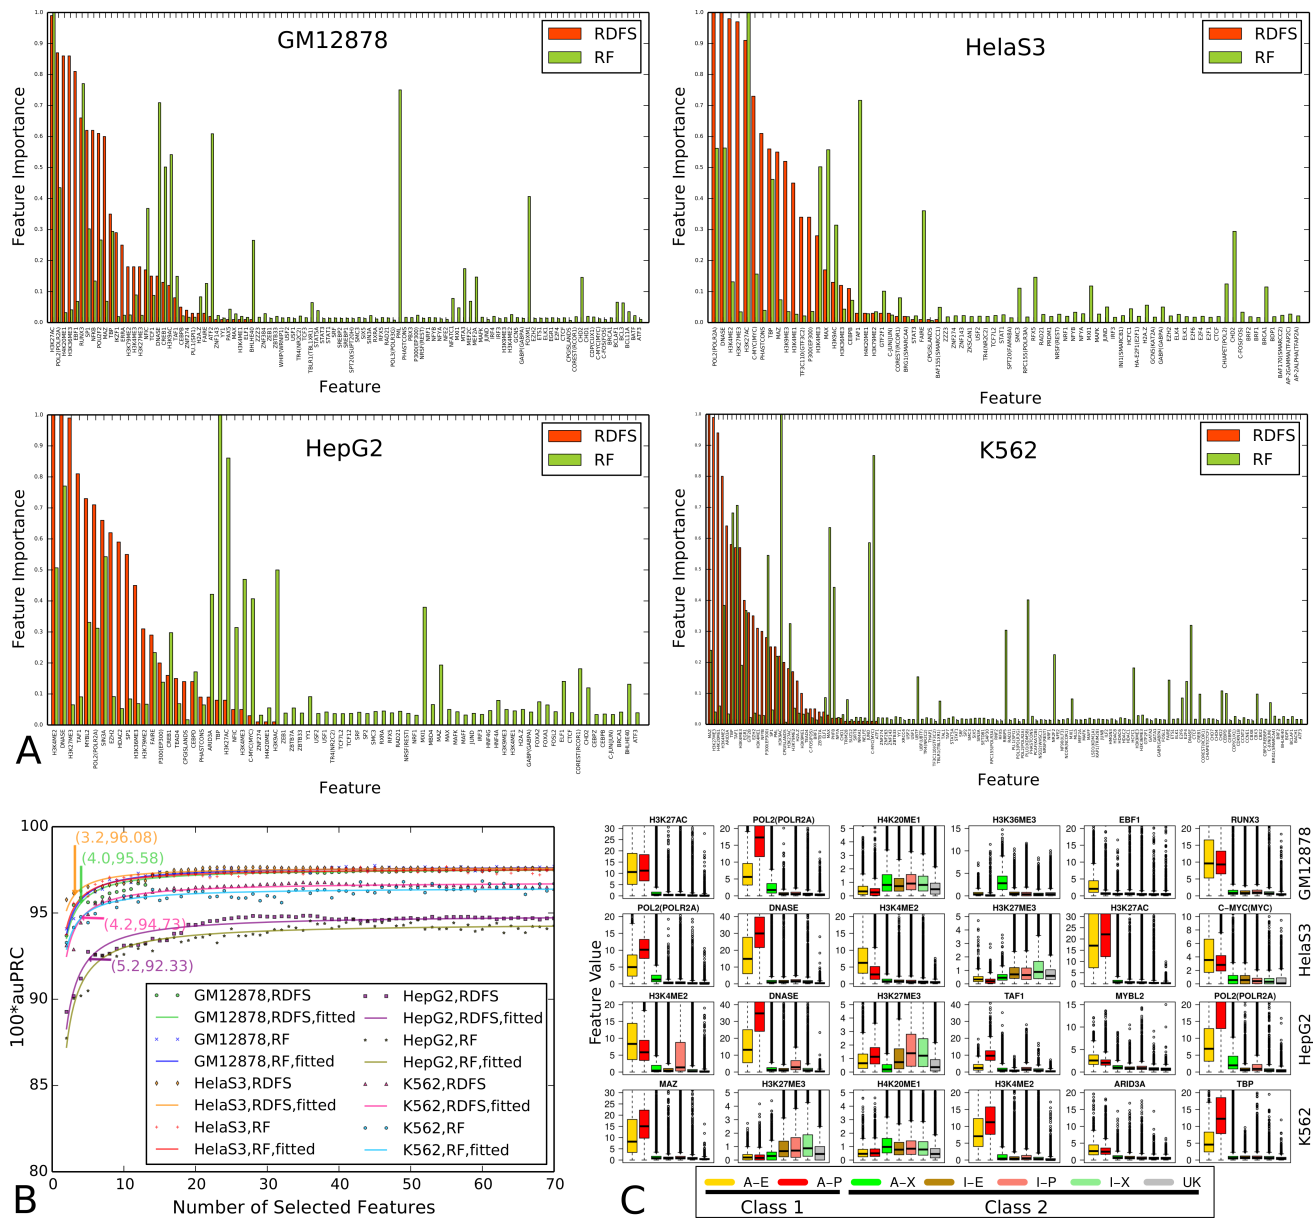

Figure S5: Feature importance, classification performance, and top features in the 2-class (A-E+A-P versus BG) scenario. A: Feature importance discovered by randomized DFS (RDFS) and random forest (RF). The random forest's feature importance scores were normalized to [0,1] for better comparison with randomized DFS. B: auPRC versus the number of features incorporated into the RDFS and RF. The annotated points indicate where a line with slope 0.5 intersects a fitted curve). C: For the top 6 features of the 2-class models generated for four well-characterized cell lines, box plots depict the range of observed feature values (log<sub>2</sub> scale) for 7 sequence classes.

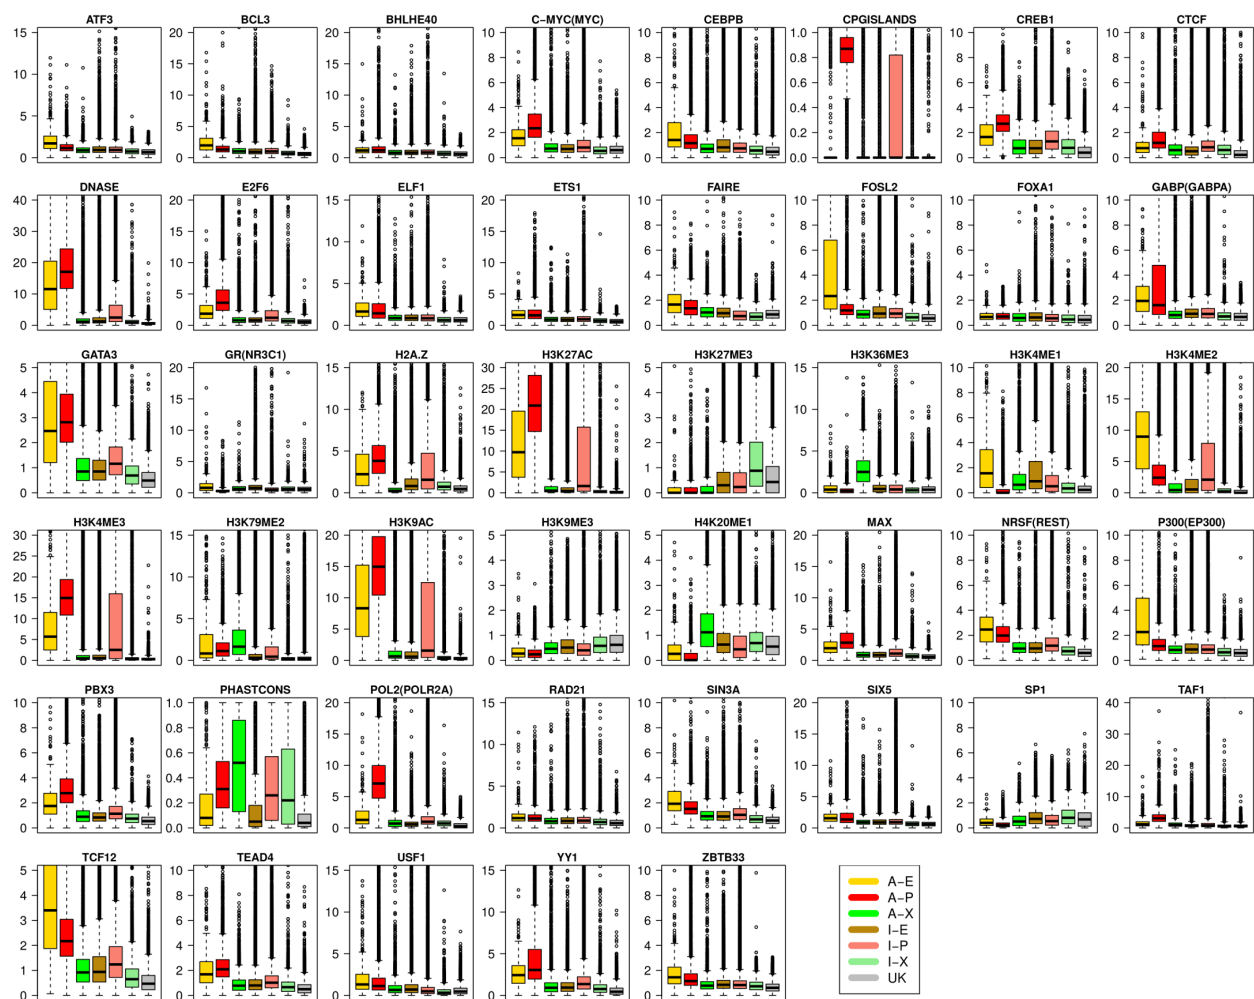

Figure S6: Box plots of all features for A549.

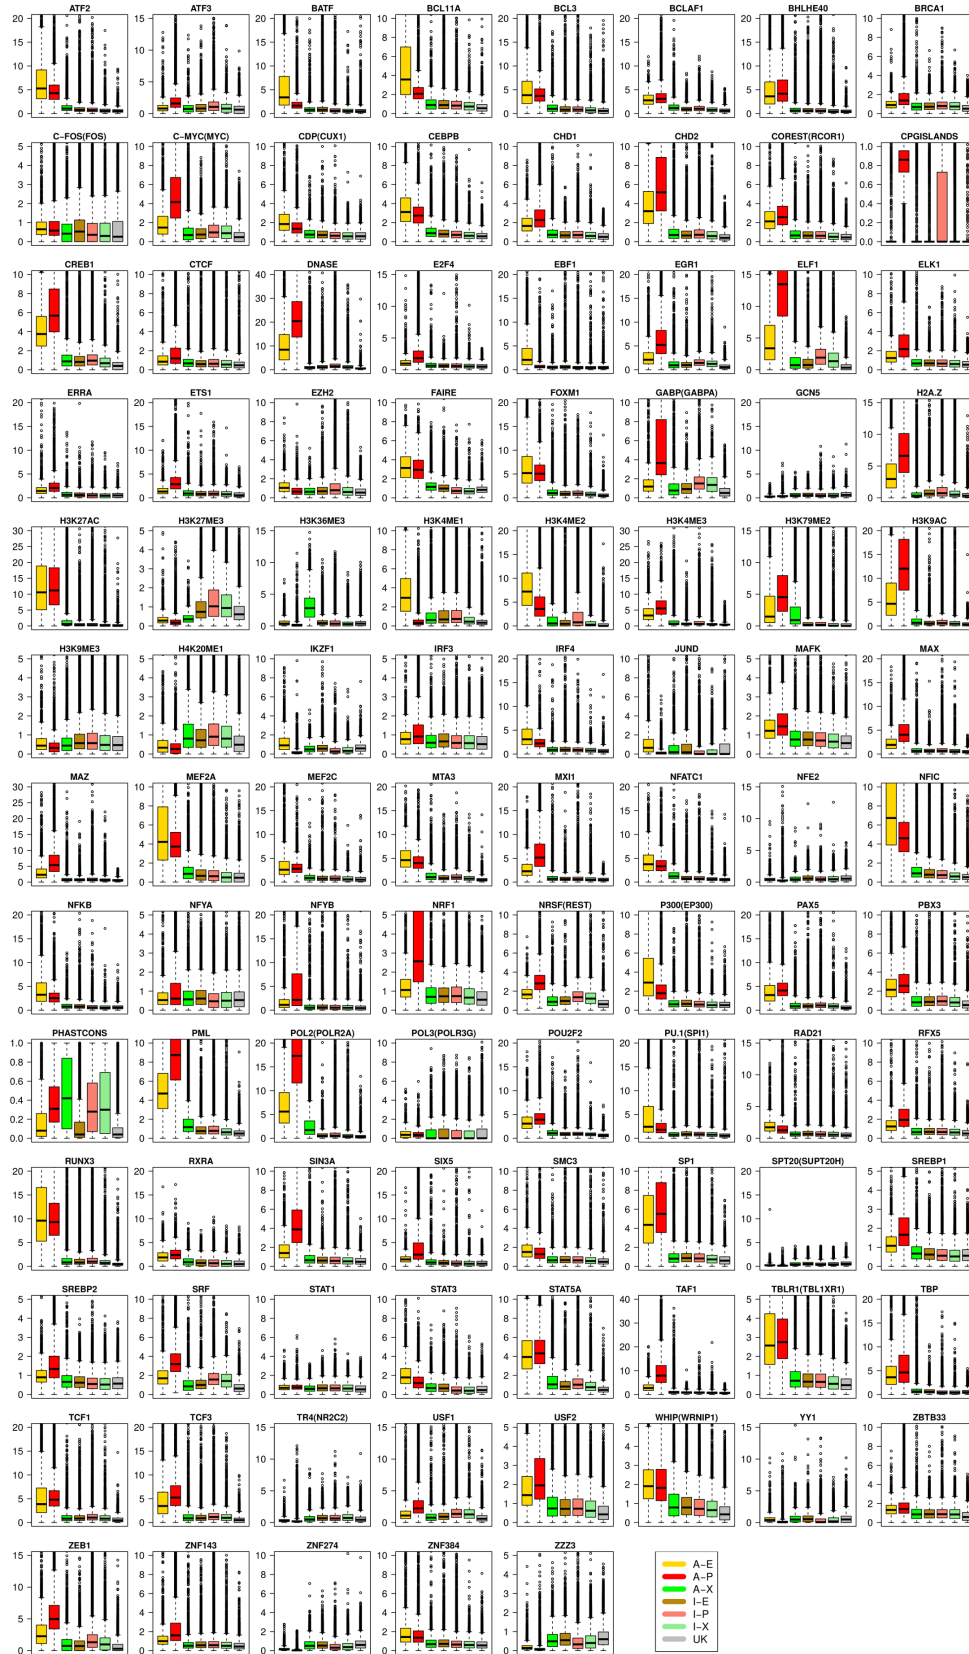

Figure S7: Box plots of all features for GM12878.



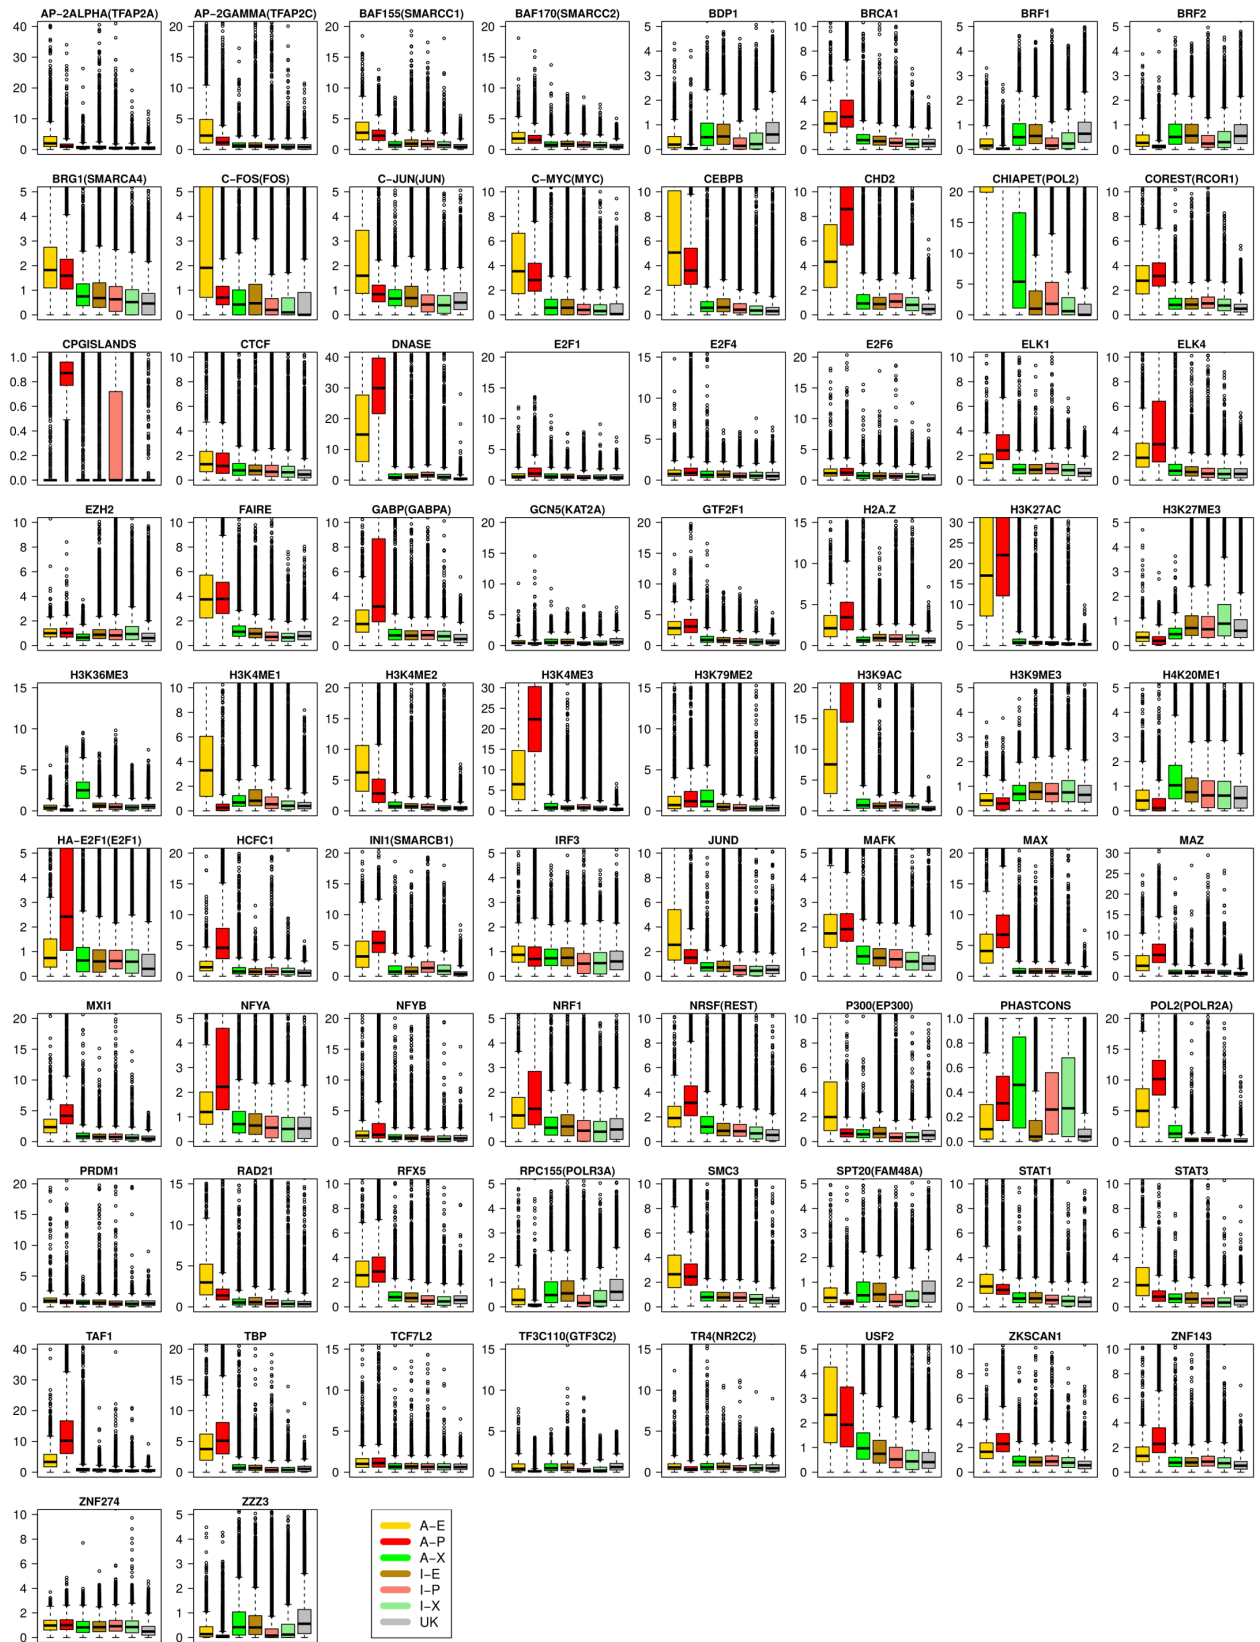

Figure S8: Box plots of all features for Helas3.

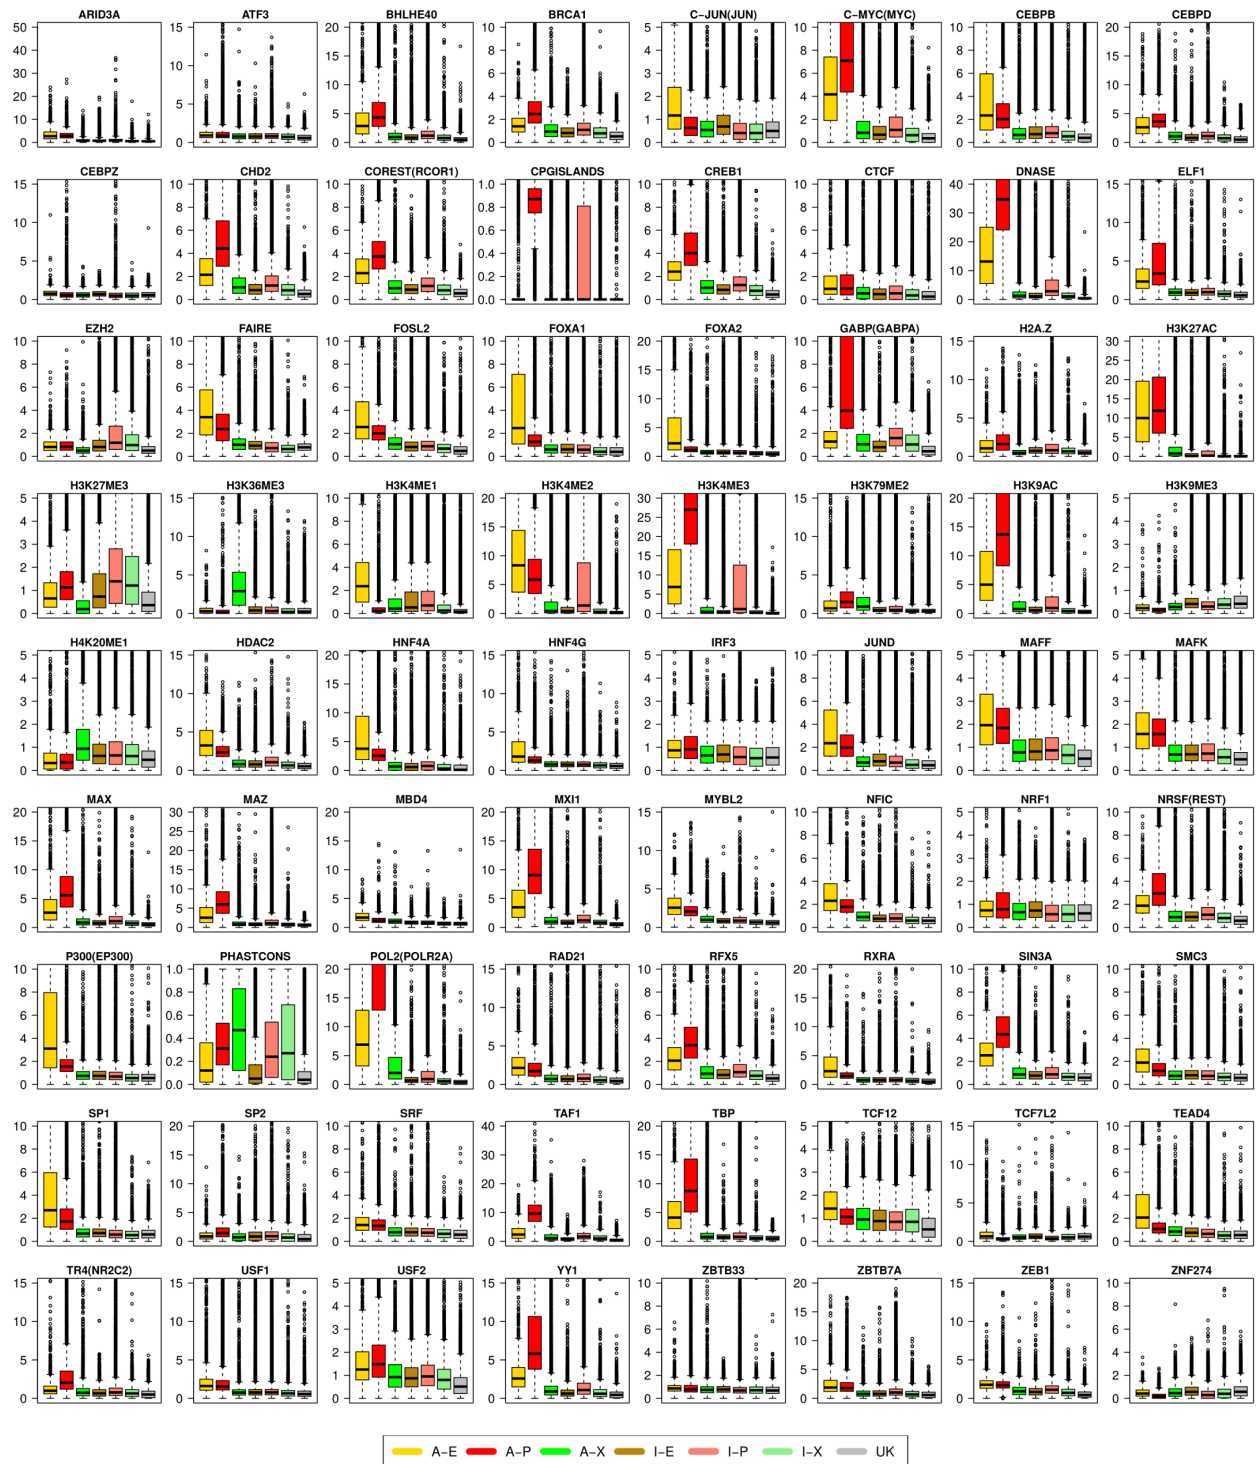

Figure S9: Box plots of all features for HepG2.

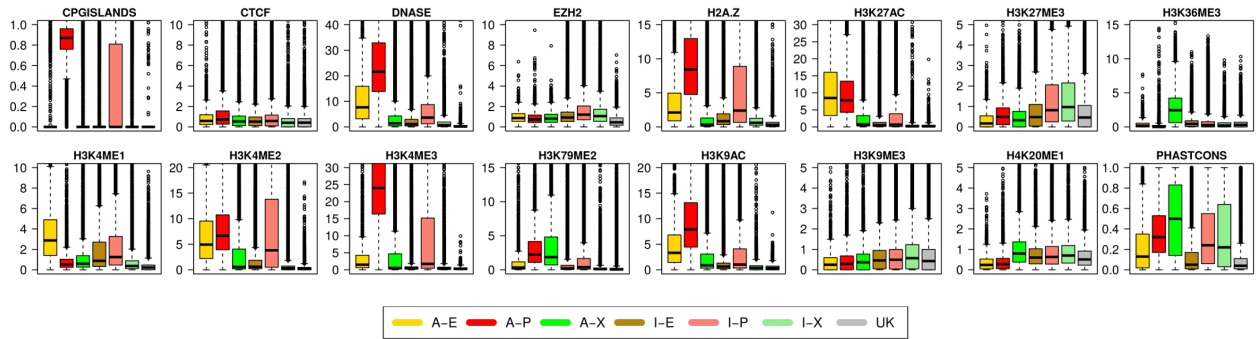

Figure S10: Box plots of all features for HMEC.

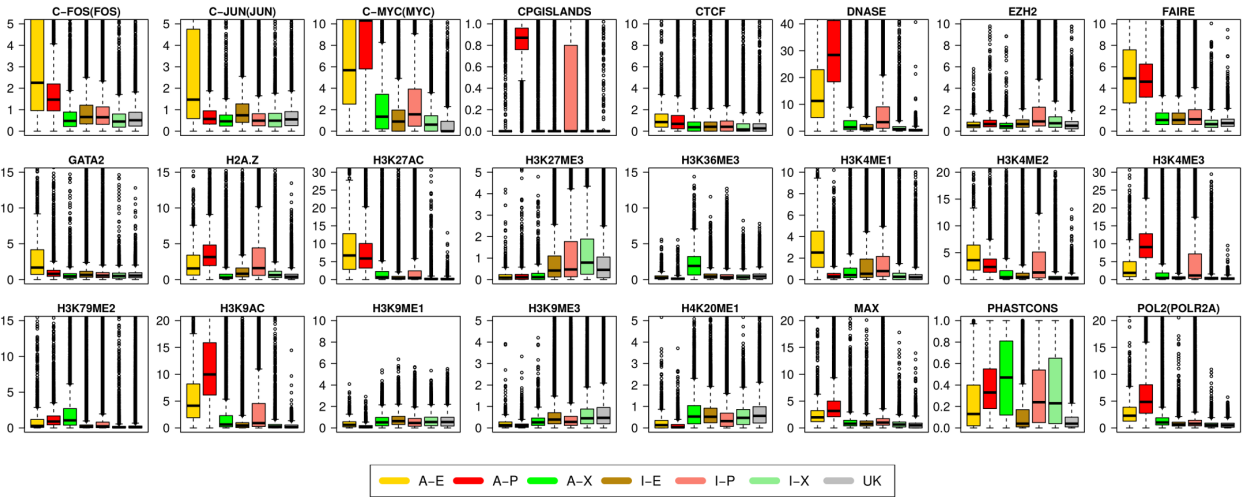

Figure S11: Box plots of all features for HUVEC.

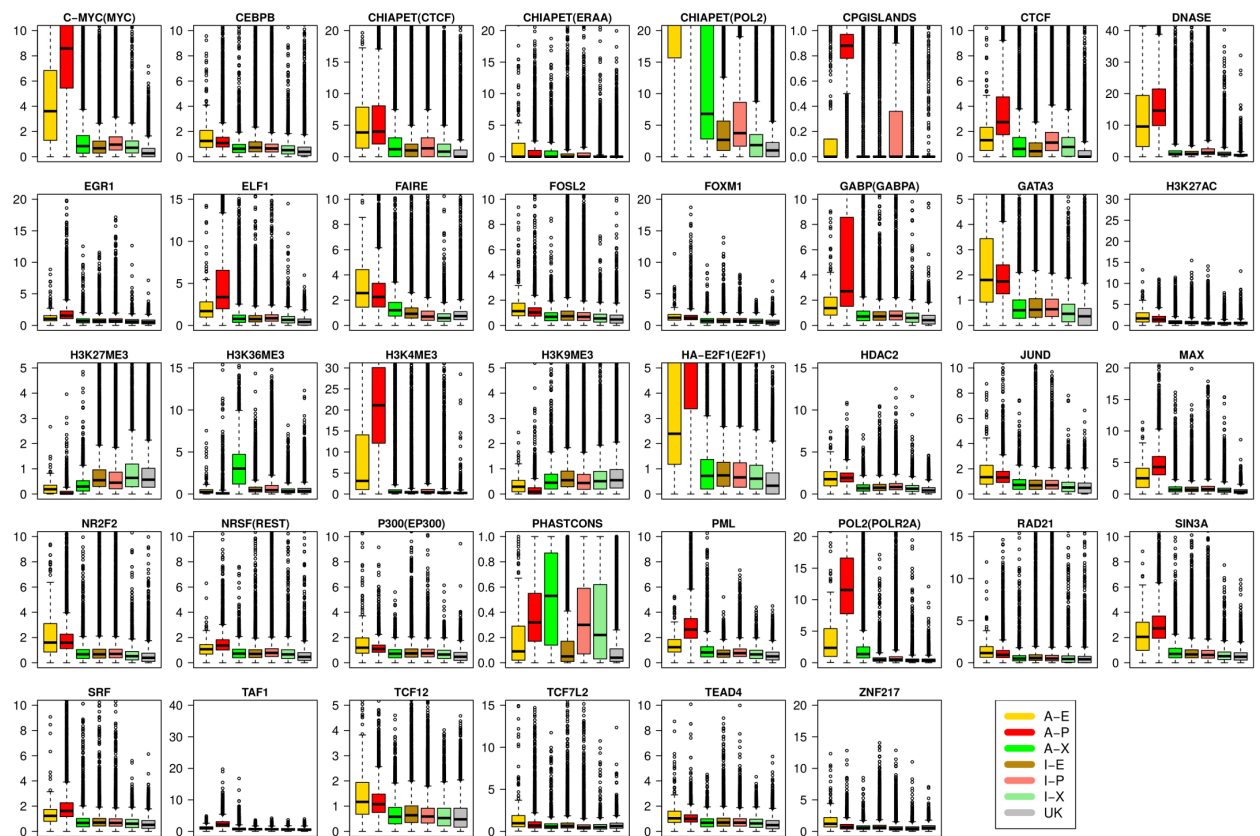

Figure S12: Box plots of all features for MCF7.

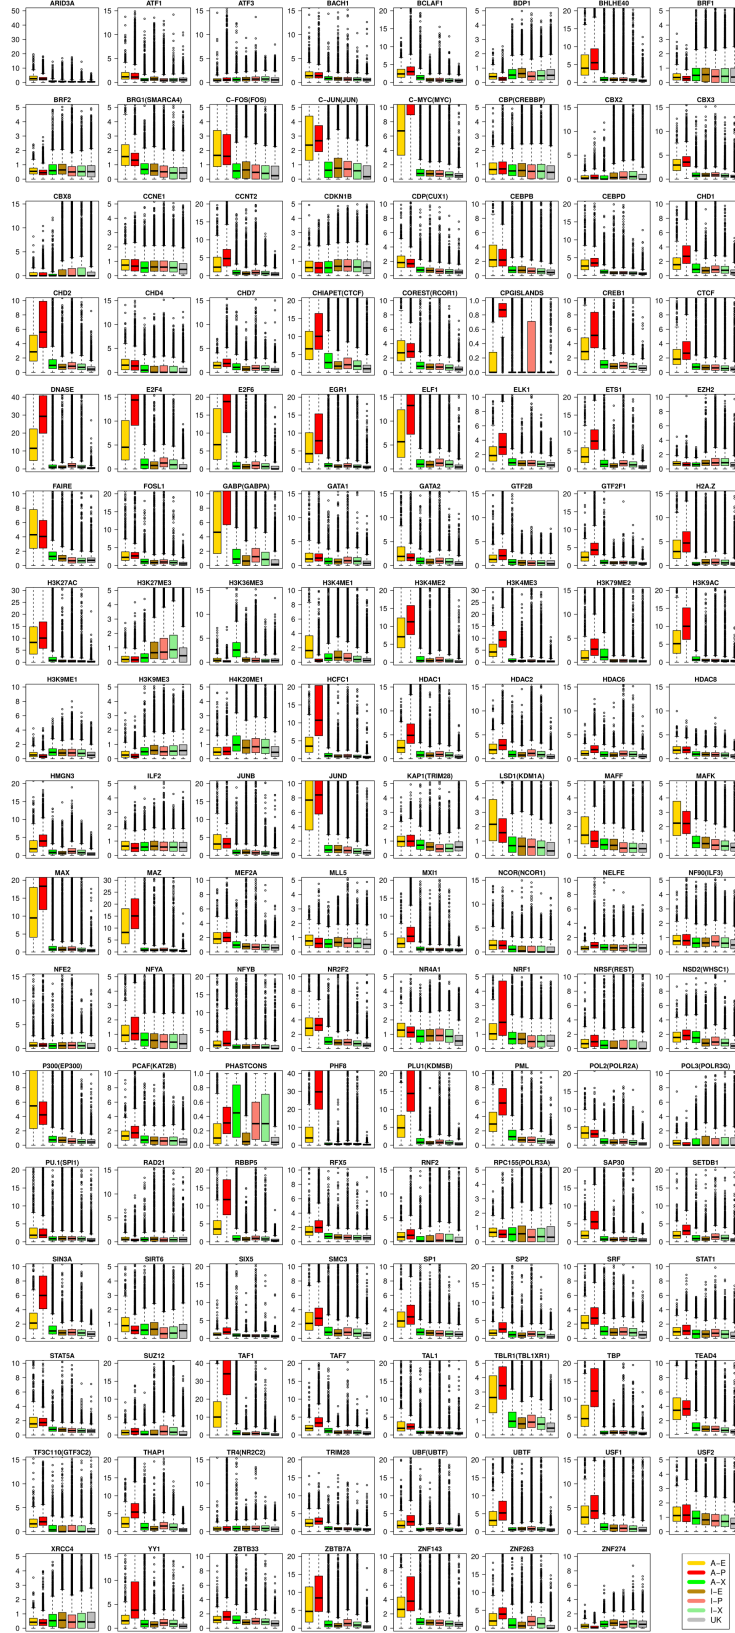

Figure S13: Box plots of all features for K562.

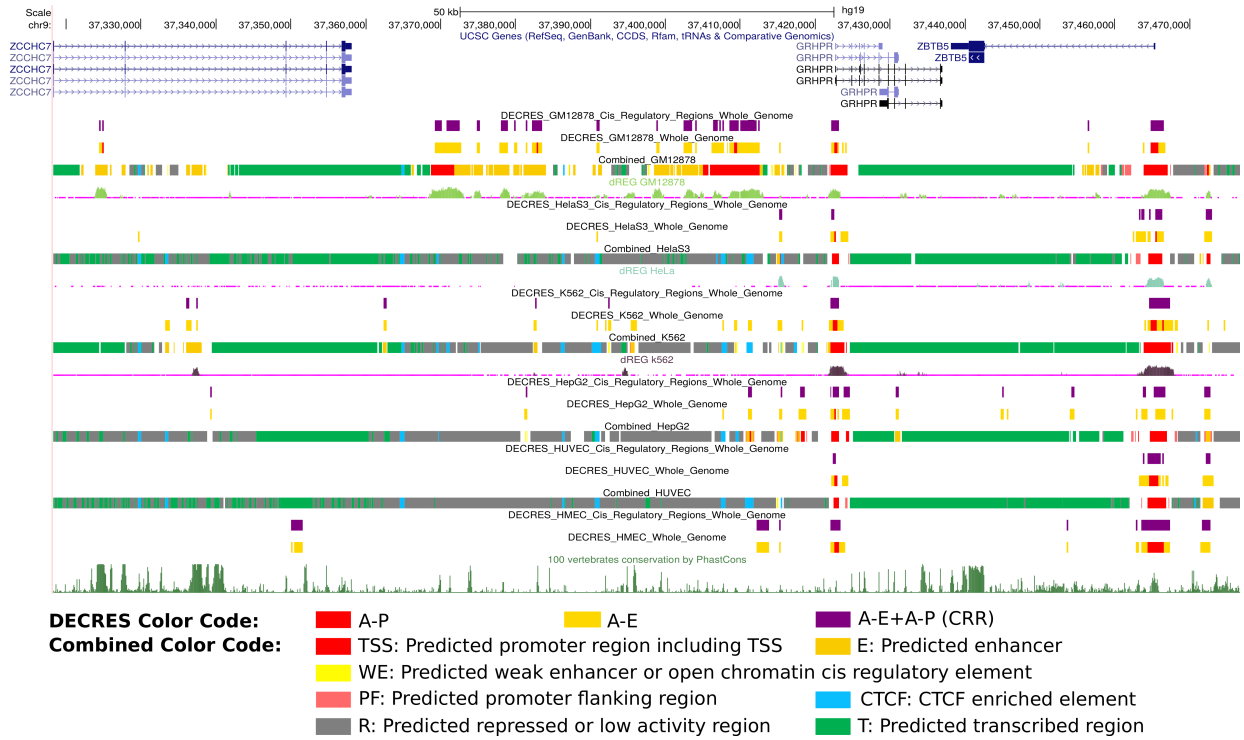

Figure S14: An example of predicted regulatory regions in the UCSC Genome Browser.

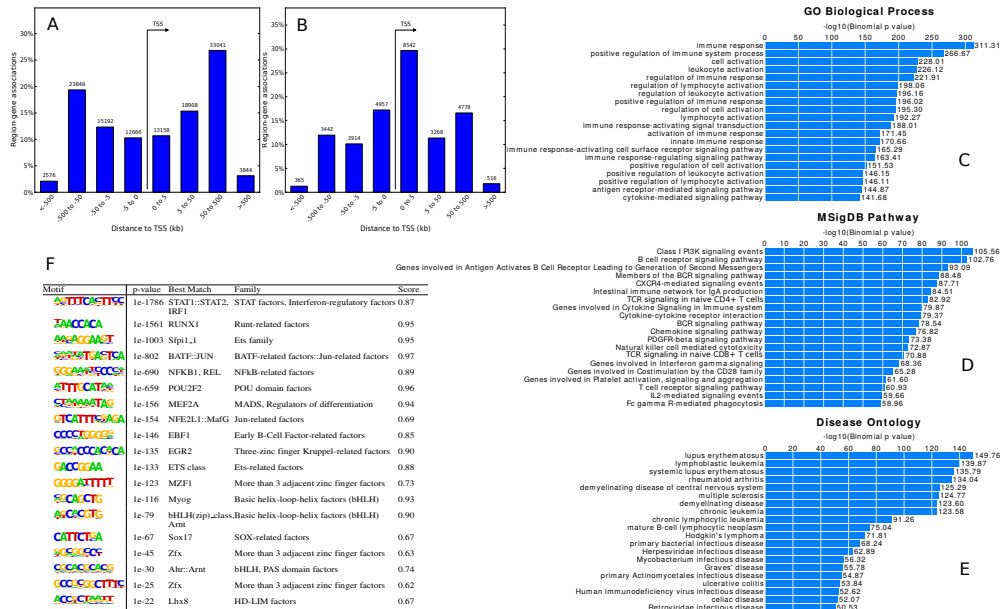

Figure S15: Functional and motif analysis of the DECRES genome-wide predictions on cell line GM12878. A: Distance from the predicted A-Es to gene TSSs. B: Distance from the predicted A-Ps to gene TSSs. C,D,E: Top 20 enriched biological processes, pathways, and diseases, respectively, in the predicted cell-specific CRRs. F: Enriched *de novo* motifs in the predicted cell specific CRRs. Column 4: families of best-matched TFs. Column 5: best match scores.

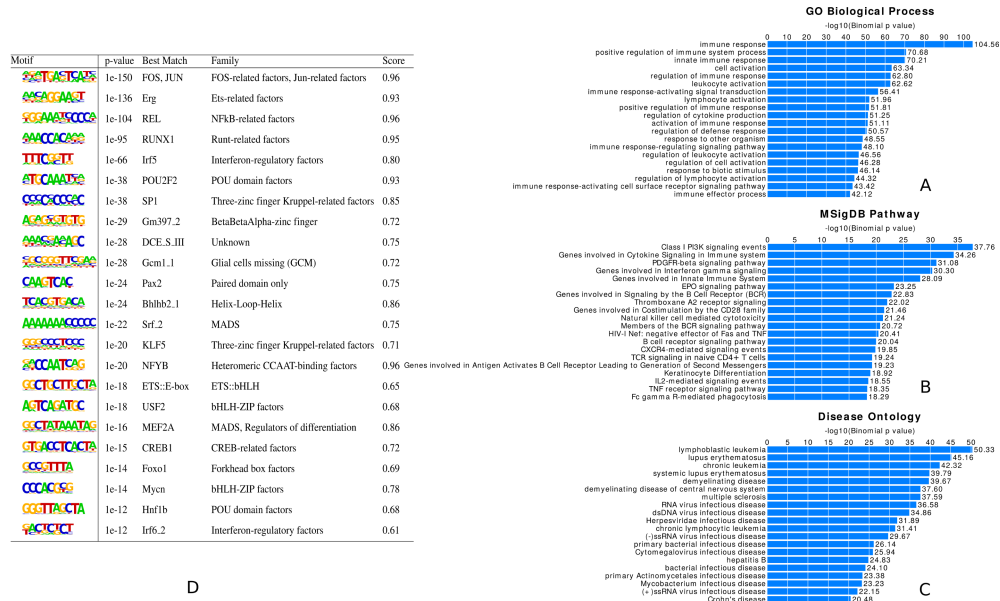

Figure S16: Functional and motif analysis of the DECRES NiA enhancers on cell line GM12878. A,B,C: Top 20 enriched biological processes, pathways, and diseases, respectively, in the NiA enhancers. D: Enriched *de novo* motifs in the NiA enhancer regions. Column 4: the families of best-matched TFs. Column 5: best match scores.

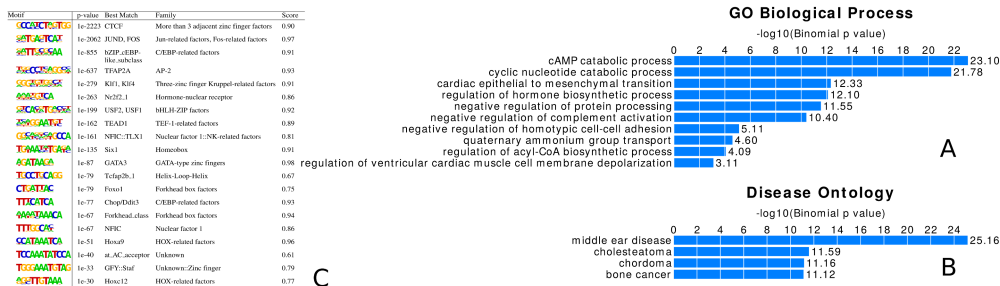

Figure S17: Functional and motif analysis of the DECRES genome-wide predictions on cell line HeLaS3. A,B: Top enriched biological processes and diseases (no pathways enriched for HeLaS3), respectively, in the predicted cell-specific CRRs. C: Enriched *de novo* motifs in the predicted cell specific CRRs. Column 4: families of best-matched TFs. Column 5: best match scores.

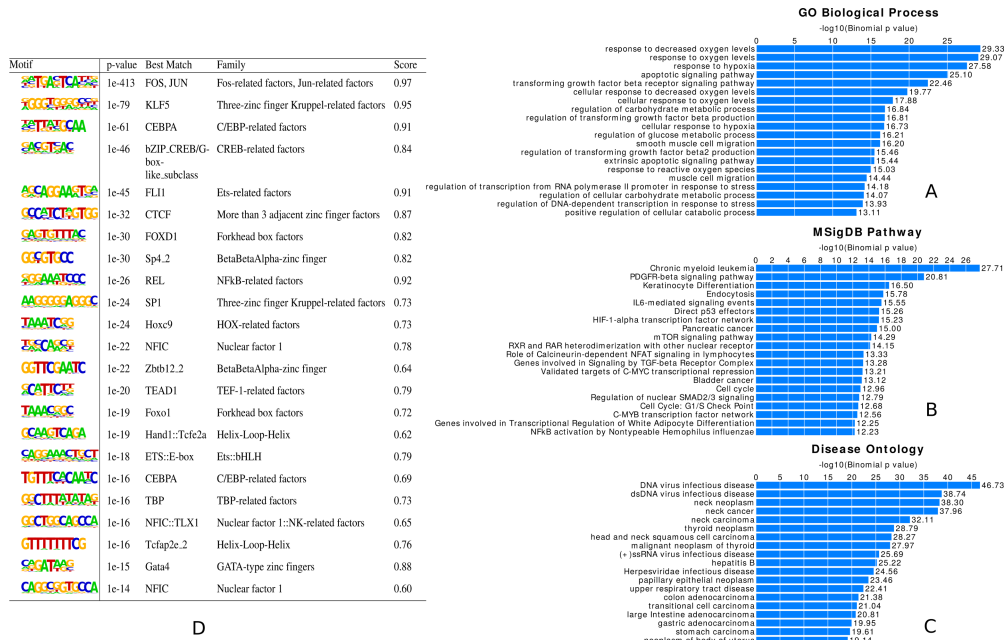

Figure S18: Functional and motif analysis of the DECRES NiA enhancers on cell line HeLaS3. A,B,C: Top 20 enriched biological processes, pathways, and diseases, respectively, in the NiA enhancers. D: Enriched *de novo* motifs in the NiA enhancer regions. Column 4: families of best-matched TFs. Column 5: best match scores.

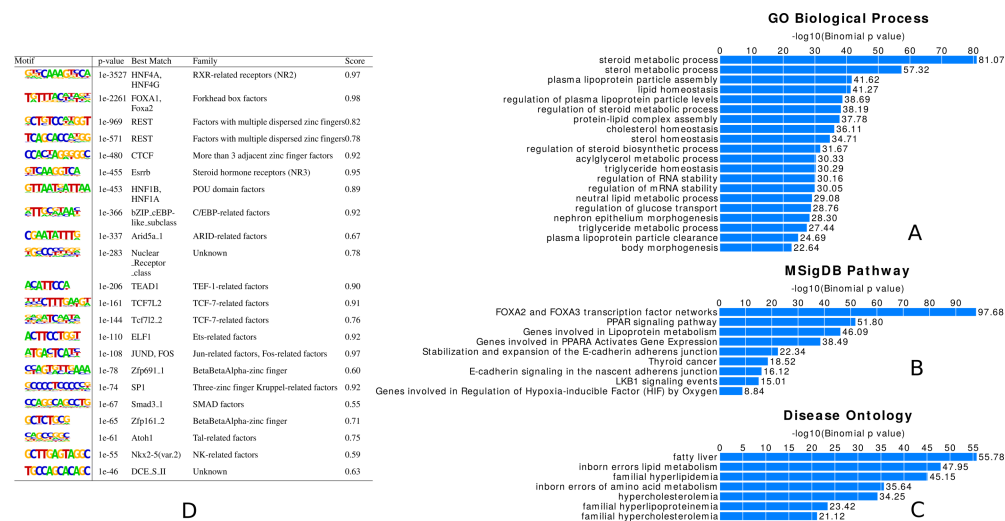

Figure S19: Functional and motif analysis of the DECRES genome-wide predictions on cell line HepG2. A,B,C: Top enriched biological processes, pathways and diseases, respectively, in the predicted cell-specific CRRs. D: Enriched *de novo* motifs in the predicted cell specific CRRs. Column 4: families of best-matched TFs. Column 5: best match scores.



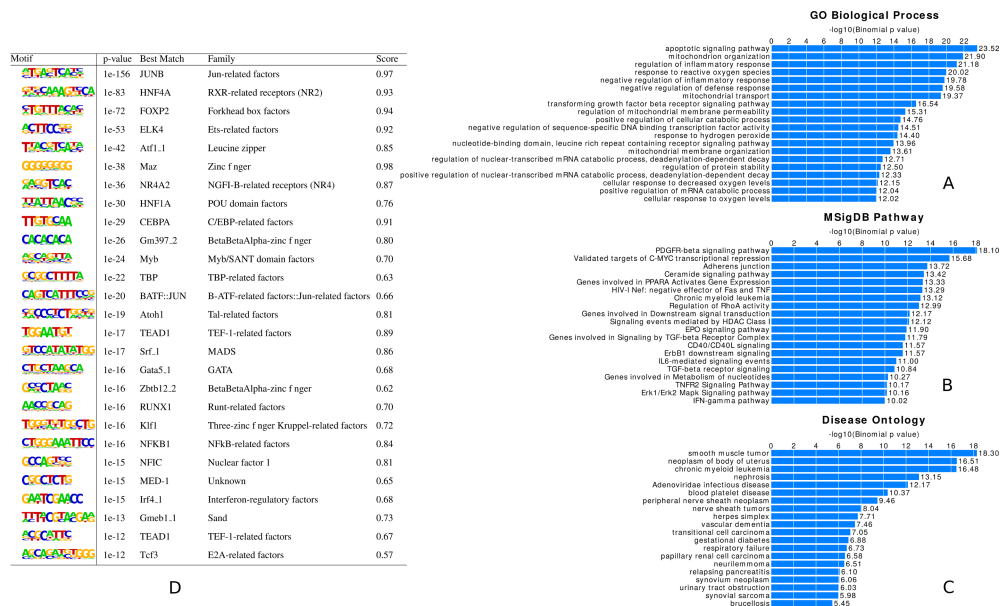

Figure S20: Functional and motif analysis of the DECRES NiA enhancers on cell line HepG2. A,B,C: Top 20 enriched biological processes, pathways, and diseases, respectively, in the NiA enhancers. D: Enriched *de novo* motifs in the NiA enhancer regions. Column 4: families of best-matched TFs. Column 5: best match scores.

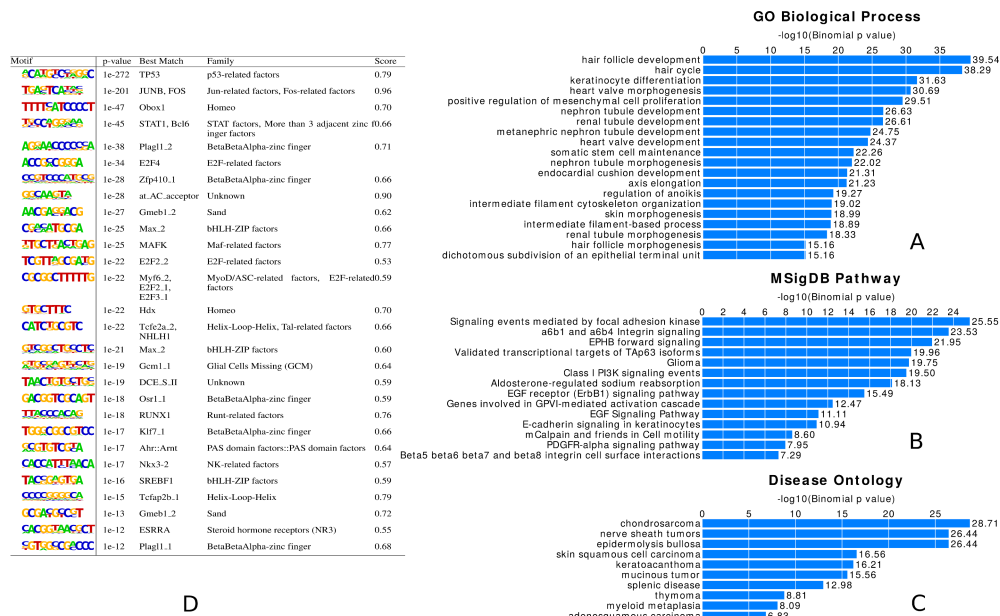

Figure S21: Functional and motif analysis of the DECRES genome-wide predictions on cell line HMEC. A,B,C: Top enriched biological processes, pathways and diseases, respectively, in the predicted cell-specific CRRs. D: Enriched *de novo* motifs in the predicted cell specific CRRs. Column 4: families of best-matched TFs. Column 5: best match scores.

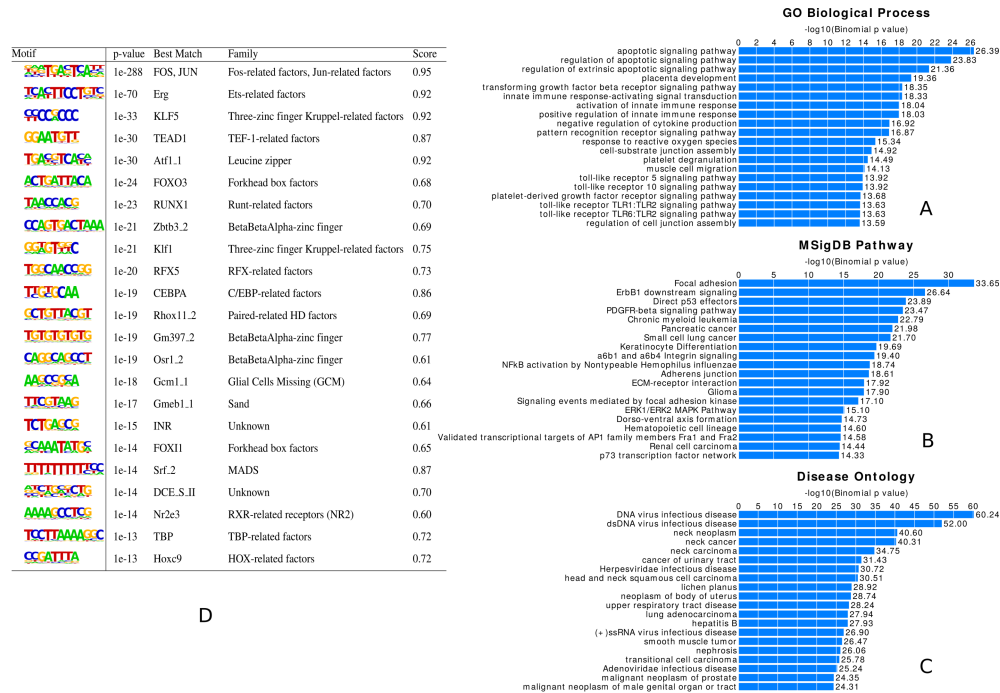

Figure S22: Functional and motif analysis of the DECRES NiA enhancers on cell line HMEC. A,B,C: Top 20 enriched biological processes, pathways, and diseases, respectively, in the NiA enhancers. D: Enriched *de novo* motifs in the NiA enhancer regions. Column 4: families of best-matched TFs. Column 5: best match scores.

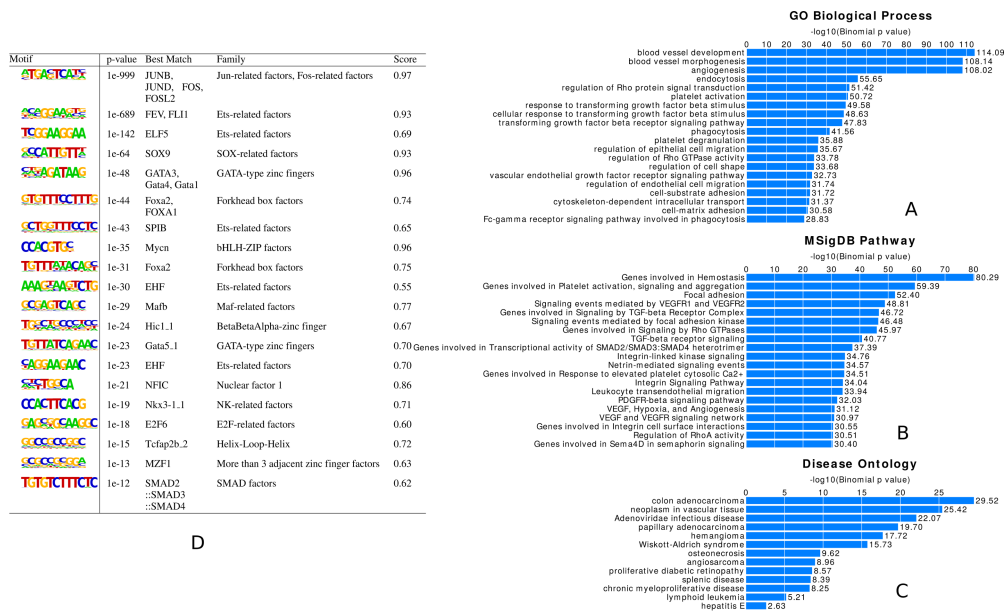

Figure S23: Functional and motif analysis of the DECRES genome-wide predictions on cell line HUVEC. A,B,C: Top enriched biological processes, pathways, and diseases, respectively, in the predicted cell-specific CRRs. D: Enriched *de novo* motifs in the predicted cell specific CRRs. Column 4: families of best-matched TFs. Column 5: best match scores.

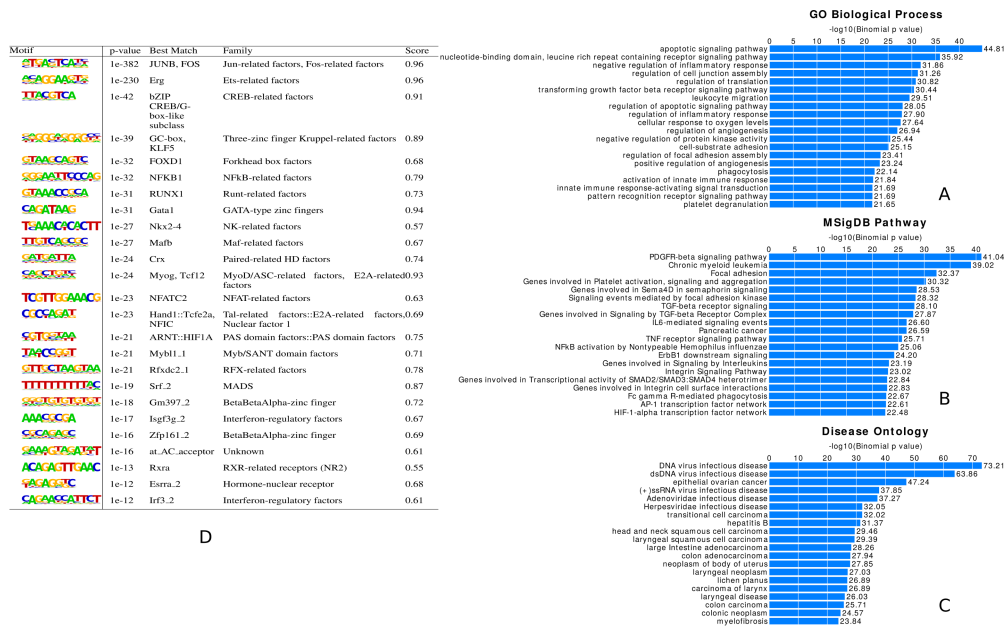

Figure S24: Functional and motif analysis of the DECRES NiA enhancers on cell line HUVEC. A,B,C: Top 20 enriched biological processes, pathways, and diseases, respectively, in the NiA enhancers. D: Enriched *de novo* motifs in the NiA enhancer regions. Column 4: families of best-matched TFs. Column 5: best match scores.

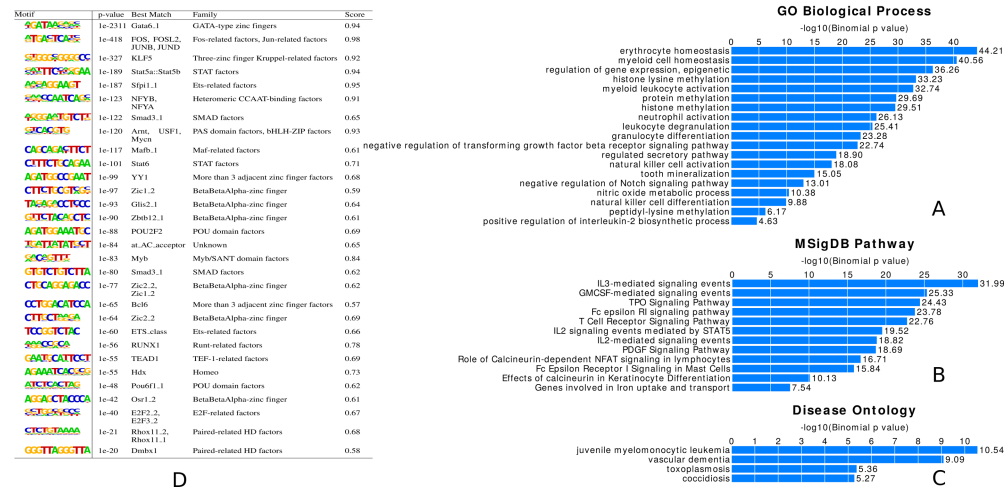

Figure S25: Functional and motif analysis of the DECRES genome-wide predictions on cell line K562. A,B,C: Top enriched biological processes, pathways and diseases, respectively, in the predicted cell-specific CRRs. D: Enriched *de novo* motifs in the predicted cell specific CRRs. Column 4: families of best-matched TFs. Column 5: best match scores.

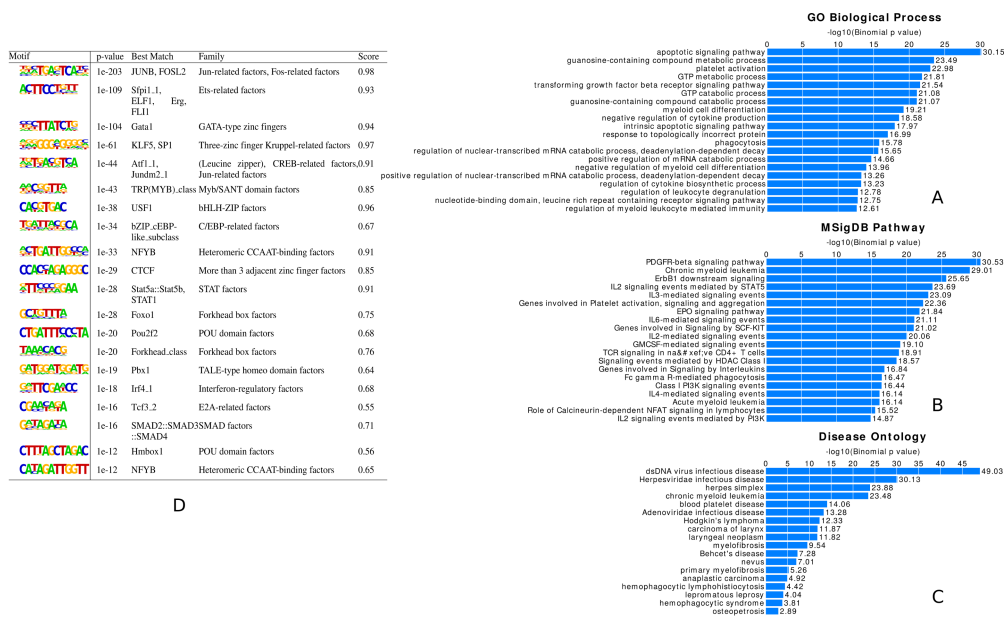

Figure S26: Functional and motif analysis of the DECRES NiA enhancers on cell line K562. A,B,C: Top 20 enriched biological processes, pathways, and diseases, respectively, in the NiA enhancers. D: Enriched *de novo* motifs in the NiA enhancer regions. Column 4: families of best-matched TFs. Column 5: best match scores.

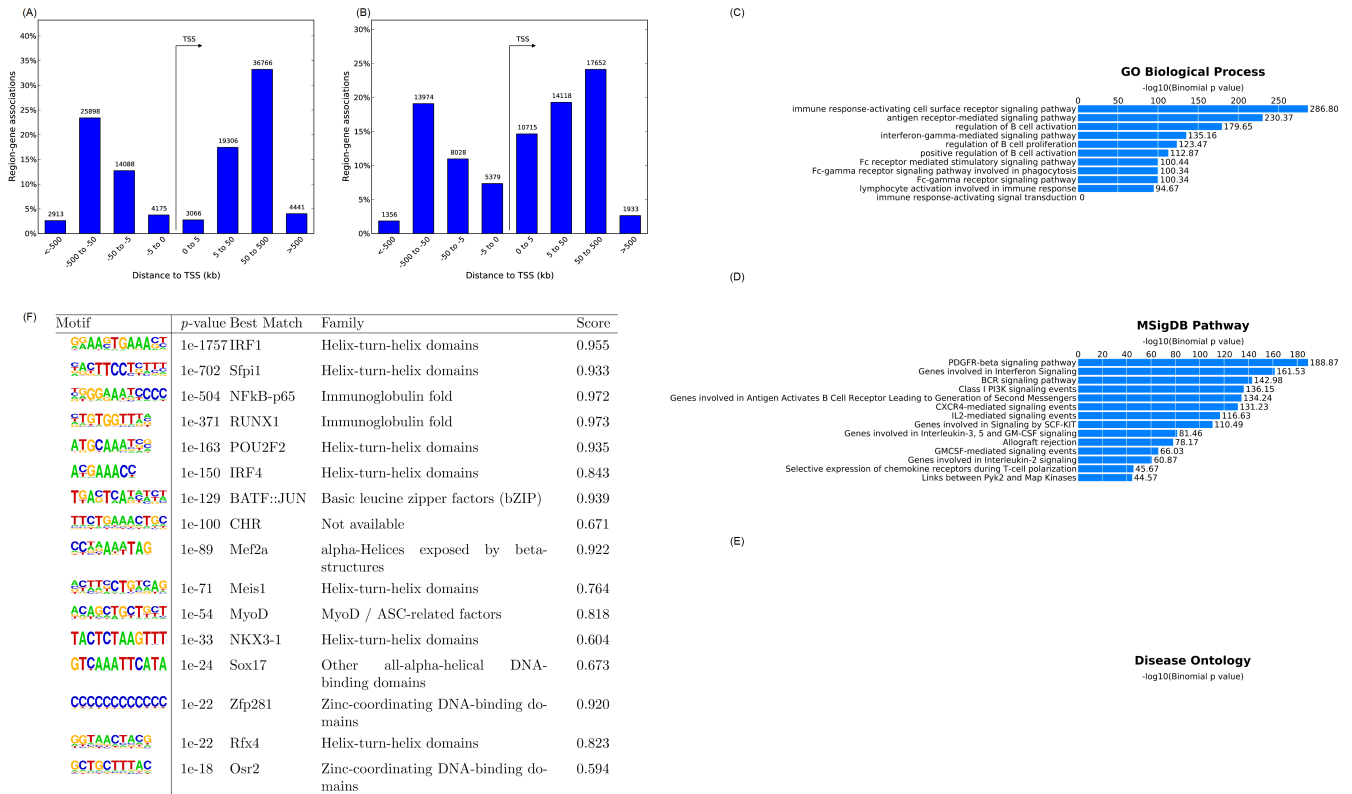

Figure S27: Functional and motif analysis of the Combined genome-wide predictions on cell line GM12878. A: Distance from the predicted A-Es to gene TSSs. B: Distance from the predicted A-Ps to gene TSSs. C,D,E: Top 20 enriched biological processes, pathways, and diseases, respectively, in the predicted cell-specific CRRs. F: Enriched *de novo* motifs in the predicted cell specific CRRs. Column 4: families of best-matched TFs. Column 5: best match scores.

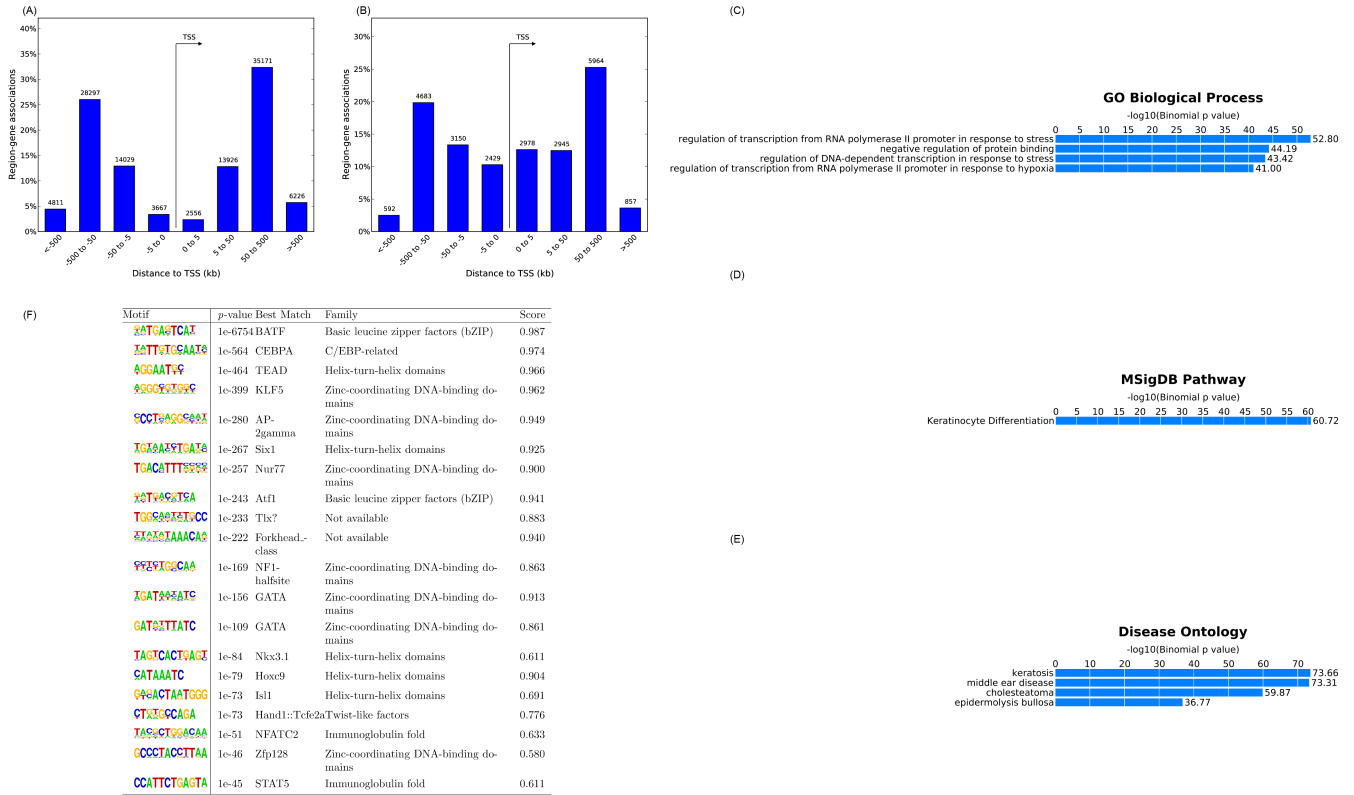

Figure S28: Functional and motif analysis of the Combined genome-wide predictions on cell line HeLaS3. A: Distance from the predicted A-Es to gene TSSs. B: Distance from the predicted A-Ps to gene TSSs. C,D,E: Top 20 enriched biological processes, pathways, and diseases, respectively, in the predicted cell-specific CRRs. F: Enriched *de novo* motifs in the predicted cell specific CRRs. Column 4: families of best-matched TFs. Column 5: best match scores.

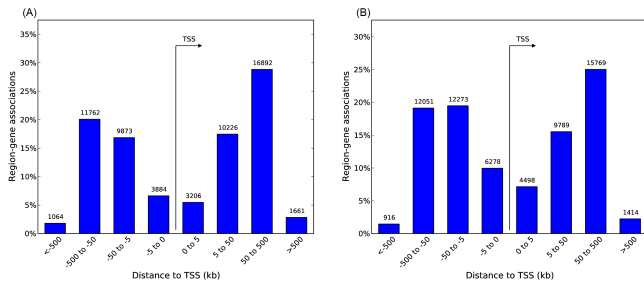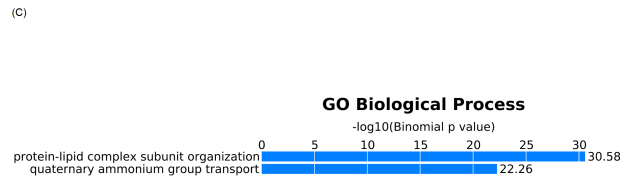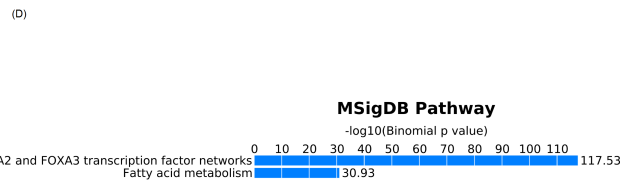

(F)

| Motif        | p-value | Best Match             | Family                                | Score |
|--------------|---------|------------------------|---------------------------------------|-------|
| GTCCAAAGTCA  | 1e-1086 | HNF4A                  | Zinc-coordinating DNA-binding domains | 0.968 |
| CCCAAAGAS    | 1e-423  | FoxEbox                | Helix-turn-helix domains              | 0.904 |
| TTAAATTAAC   | 1e-352  | Hnf1                   | Helix-turn-helix domains              | 0.949 |
| CTCCCTGGG    | 1e-101  | Nr5a2                  | Zinc-coordinating DNA-binding domains | 0.876 |
| CCACCACTCA   | 1e-87   | Six1                   | Helix-turn-helix domains              | 0.592 |
| CATTCTGASCC  | 1e-74   | MafA                   | Basic leucine zipper factors (bZIP)   | 0.632 |
| TTGTGAAA     | 1e-68   | CEBPA                  | C/EBP-related                         | 0.901 |
| AGCTGAG      | 1e-63   | Nuclear Receptor class | Not available                         | 0.786 |
| ATACTCCCTTT  | 1e-61   | Pou6f1                 | Helix-turn-helix domains              | 0.576 |
| CCCGAGGGG    | 1e-60   | KLF5                   | Zinc-coordinating DNA-binding domains | 0.875 |
| TSACTCTAG    | 1e-56   | T                      | Basic helix-loop-helix factors (bHLH) | 0.653 |
| AGCCCAAGGAG  | 1e-49   | Egr2                   | Zinc-coordinating DNA-binding domains | 0.691 |
| CAGGAAGCT    | 1e-48   | EWS-ERGFusion          | Helix-turn-helix domains              | 0.744 |
| CCCTCCRC     | 1e-48   | Tlx?                   | Not available                         | 0.658 |
| CCCGGCG      | 1e-47   | Tcfap2e                | Basic domains                         | 0.715 |
| CCCAATCC     | 1e-43   | NFKB1                  | Immunoglobulin fold                   | 0.733 |
| GTCTAGCAATC  | 1e-42   | Rfx3                   | Helix-turn-helix domains              | 0.670 |
| CTAGGGAAGGA  | 1e-42   | at_AC_aceptor          | Not available                         | 0.575 |
| CTTGAAAAT    | 1e-41   | NFATC2                 | Immunoglobulin fold                   | 0.892 |
| CGAAGCTGAAAC | 1e-40   | DCE.S.I                | Not available                         | 0.637 |

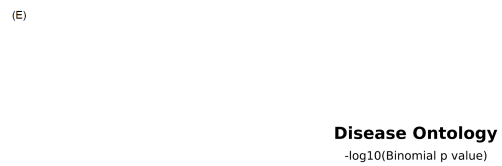

Figure S29: Functional and motif analysis of the Combined genome-wide predictions on cell line HepG2. A: Distance from the predicted A-Es to gene TSSs. B: Distance from the predicted A-Ps to gene TSSs. C,D,E: Top 20 enriched biological processes, pathways, and diseases, respectively, in the predicted cell-specific CRRs. F: Enriched *de novo* motifs in the predicted cell specific CRRs. Column 4: families of best-matched TFs. Column 5: best match scores.

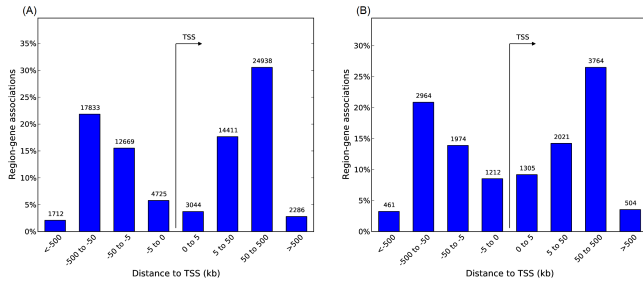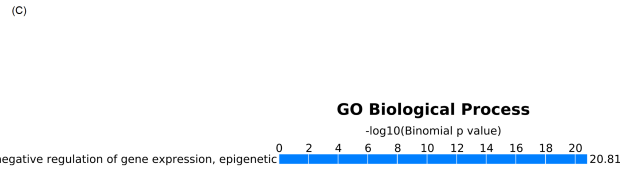

| Motif                | p-value Best Match | Family                                | Score |
|----------------------|--------------------|---------------------------------------|-------|
| <b>AGATAAGGG</b>     | 1e-2706 Gata2      | Zinc-coordinating DNA-binding domains | 0.980 |
| <b>TGCTGAGTCALIS</b> | 1e-630 Bach2       | NF-E2-like factors                    | 0.974 |
| <b>AAGAGGAAGT</b>    | 1e-238 Sfp1        | Helix-turn-helix domains              | 0.921 |
| <b>GGGGGGVXXXX</b>   | 1e-227 KLF5        | Zinc-coordinating DNA-binding domains | 0.921 |
| <b>GCACCTCAGATIS</b> | 1e-202 CREB        | CREB-like factors                     | 0.600 |
| <b>TTCFAGGAAE</b>    | 1e-176 STAT5       | Immunoglobulin fold                   | 0.948 |
| <b>TAGTACATCAA</b>   | 1e-175 Six1        | Helix-turn-helix domains              | 0.581 |
| <b>TAGGTAATCTC</b>   | 1e-173 Spz1        | Not available                         | 0.667 |
| <b>TGTAAACTGTCA</b>  | 1e-170 Myb         | Helix-turn-helix domains              | 0.763 |
| <b>CCACCGTCCCC</b>   | 1e-166 Zfp161      | Zinc-coordinating DNA-binding domains | 0.602 |
| <b>GAGTCCAGACA</b>   | 1e-163 Tbox:Smad   | Not available                         | 0.805 |
| <b>GGCCGAGCTCA</b>   | 1e-140 RXR         | Zinc-coordinating DNA-binding domains | 0.711 |
| <b>GTACCAGGTT</b>    | 1e-133 Nkx3-1      | Helix-turn-helix domains              | 0.546 |
| <b>GCAGACAGAAAG</b>  | 1e-130 DCE.S.I     | Not available                         | 0.613 |
| <b>TTTTAGCCATA</b>   | 1e-128 Zfp187      | Zinc-coordinating DNA-binding domains | 0.593 |
| <b>ATZACCATCCTA</b>  | 1e-126 Pou2E3      | Helix-turn-helix domains              | 0.639 |
| <b>GACCCGAAACAG</b>  | 1e-121 DCE.S.I     | Not available                         | 0.611 |
| <b>CATCTTCCCTCC</b>  | 1e-116 E2F2        | Helix-turn-helix domains              | 0.632 |
| <b>GGTCTACAGCTA</b>  | 1e-111 DCE.S.II    | Not available                         | 0.614 |
| <b>CCAGAAATCACC</b>  | 1e-109 Hdx         | Helix-turn-helix domains              | 0.749 |

(D)

**MSigDB Pathway**  
-log10(Binomial p value)

(E)

**Disease Ontology**  
-log10(Binomial p value)

Figure S30: Functional and motif analysis of the Combined genome-wide predictions on cell line K562. A: Distance from the predicted A-Es to gene TSSs. B: Distance from the predicted A-Ps to gene TSSs. C,D,E: Top 20 enriched biological processes, pathways, and diseases, respectively, in the predicted cell-specific CRRs. F: Enriched *de novo* motifs in the predicted cell specific CRRs. Column 4: families of best-matched TFs. Column 5: best match scores.



## References

- [1] B. Arnett, P. Soisson, B.S. Ducatman, and P. Zhang. Expression of CAAT enhancer binding protein beta (C/EBP beta) in cervix and endometrium. *Molecular Cancer*, 2:21, 2003.
- [2] M. Beger, K. Butz, C. Denk, T. Williams, H.C. Hurst, and F. Hoppe-Seyler. Expression pattern of AP-2 transcription factors in cervical cancer cells and analysis of their influence on human papillomavirus oncogene transcription. *Journal of Molecular Medicine*, 79(5-6):314–320, 2001.
- [3] R.H. Costa, V.V. Kalinichenko, A.X. Holterman, and X. Wang. Transcription factors in liver development, differentiation, and regeneration. *Hepatology*, 38(6):1331–1347, 2003.
- [4] A. Dev, S. Iyer, B. Razani, and G. Cheng. NF- $\kappa$ B and innate immunity. *Current Topics in Microbiology and Immunology*, 349:115–143, 2011.
- [5] J.D. Fleming, G. Pavesi, P. Benatti, C. Imbriano, R. Mantovani, and K. Struhl. NF-Y coassociates with FOS at promoters, enhancers, repetitive elements, and inactive chromatin regions, and is stereopositioned with growth-controlling transcription factors. *Genome Research*, 23(8):1195–1209, 2013.
- [6] D. Kleftogiannis, P. Kalnis, and V.B. Bajic. DEEP: A general computational framework for predicting enhancers. *Nucleic Acids Research*, 43(1):e6, 2015.
- [7] A.K. Linnemann, H. O’Geen, S. Keles, P.J. Farnham, and E.H. Bresnick. Genetic framework for GATA factor function in vascular biology. *Proceedings of the National Academy of Sciences*, 108(33):13641–13646, 2011.
- [8] R. Lopez, E. Garrido, G. Vazquez, P. Pina, C. Perez, I. Alvarado, and M. Salcedo. A subgroup of HOX Abd-B gene is differentially expressed in cervical cancer. *International Journal Gynecological Cancer*, 16(3):1289–1296, 2006.
- [9] A.L. Malt, J. Cagliero, K. Legent, J. Silber, A. Zider, and D. Flagiello. Alteration of TEAD1 expression levels confers apoptotic resistance through the transcriptional up-regulation of Livin. *PLoS One*, 7(9):e45498, 2012.
- [10] E.V. Mityushova, N.D. Aksenov, and I.I. Marakhova. STAT5 in regulation of chronic leukemia K562 cell proliferation: Inhibitory effect of WHI-P131. *Cell and Tissue Biology*, 4(1):63–69, 2010.
- [11] T. Okuda, M. Nishimura, M. Nakao, and Y. Fujita. RUNX1/AML1: A central player in hematopoiesis. *International Journal of Hematology*, 74(3):252–257, 2001.
- [12] G.V. Samant, M.O. Schupp, M. Francois, S. Moleri, R.K. Kothinti, C.Z. Chun, I. Sinha, S. Sellars, N. Leigh, K. Pramanik, M.A. Horswill, I. Remadevi, K. Li, G.A. Wilkinson, N.M. Tabatabai, M. Beltrame, P. Koopman, and R. Ramchandran. Sox factors transcriptionally regulate ROBO4 gene expression in developing vasculature in zebrafish. *The Journal of Biological Chemistry*, 286:30740–30747, 2011.
- [13] H. Schrem, J. Klempnauer, and J. Borlak. Liver-enriched transcription factors in liver function and development. Part II: The C/EBPs and D site-binding protein in cell cycle control, carcinogenesis, circadian gene regulation, liver regeneration, apoptosis, and liver-specific gene regulation. *Pharmacological Reviews*, 56(2):291–330, 2004.
- [14] C.C. Thornton, F. Al-Rashed, D. Calay, G.M. Birdsey, A. Bauer, H. Mylroie, B.J. Morley, A.M. Randi, D.O. Haskard, J.J. Boyle, and J.C. Mason. Methotrexate-mediated activation of an AMPK-CREB-dependent pathway: A novel mechanism for vascular protection in chronic systemic inflammation. *Annals of the Rheumatic Diseases*, 75(2):439–448, 2015.
- [15] P. Wang, J. Xu, and C. Zhang. CREB, a possible upstream regulator of Bcl-2 in trichosanthin-induced HeLa cell apoptosis. *Molecular Biology Reports*, 37(4):1891–1896, 2010.
- [16] Z. Wang, E.P. Bishop, and P.A. Burke. Expression profile analysis of the inflammatory response regulated by hepatocyte nuclear factor 4 $\alpha$ . *BMC Genomics*, 12:128, 2011.

- [17] H. Zhang, C. Liu, Z. Zha, B. Zhao, J. Yao, S. Zhao, Y. Xiong, Q. Lei, and K. Guan. TEAD transcription factors mediate the function of TAZ in cell growth and epithelial-mesenchymal transition. *The Journal of Biological Chemistry*, 284(20):13355–13362, 2009.
- [18] J. Zhu, D.M. Giannola, Y. Zhang, A.J. Rivera, and S.G. Emerson. NF-Y cooperates with USF1/2 to induce the hematopoietic expression of HOXB4. *Blood*, 102(7):2420–2427, 2003.
